# Supplementary material for: 1T MoS2/CoS2 heterostructures enabling enhanced resistive switching behavior in sodium alginate-based flexible memristors
Source: Royal Society of Chemistry journal article supplement (doi:10.1039/d3tc03147k), 2023-01-01
Supplement: d3tc03147k1.pdf [file d3tc03147k1.pdf]

## Supporting Information

### **1T MoS<sub>2</sub>/CoS<sub>2</sub> Heterostructures Enabling Enhanced Resistive Switching Behavior in Sodium Alginate-based Flexible Memristors**

Zipan Jiao<sup>a</sup>, Xiaoyan Lan<sup>a</sup>, Xinglan Zhou<sup>a</sup>, Kunjie Wang<sup>a</sup>, Haoran Zong<sup>b</sup>, Peng Zhang<sup>a,\*</sup> and Benhua Xu<sup>b,\*</sup>

<sup>a</sup> Qinghai Provincial Engineering Research Center of High-Performance Light Metal Alloys and Forming, Qinghai Provincial Key Laboratory of New Light Alloys, Qinghai University, Xining 810016, China

<sup>b</sup> Chemical Engineering College, Qinghai University, Xining 810016, China

\*Correspondence: [zhangpeng@qhu.edu.cn](mailto:zhangpeng@qhu.edu.cn) (P. Zhang); [xubenhua@qhu.edu.cn](mailto:xubenhua@qhu.edu.cn) (B. H. Xu)

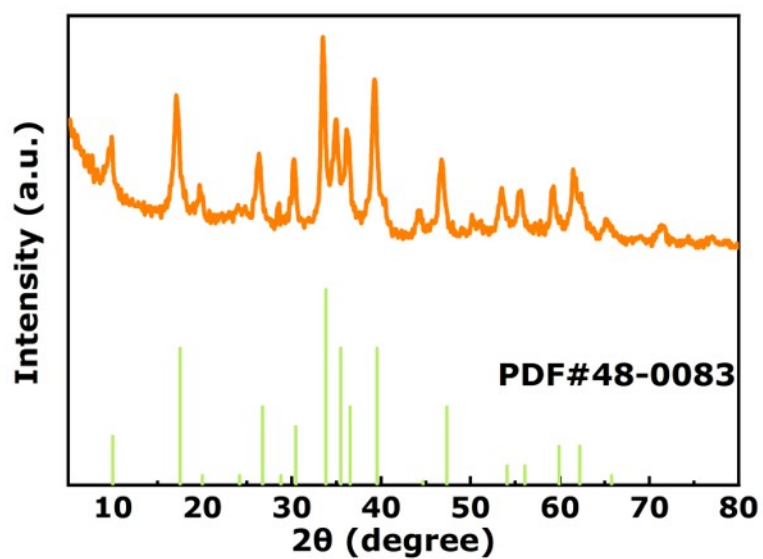

Fig. S1 XRD pattern of Co precursor.

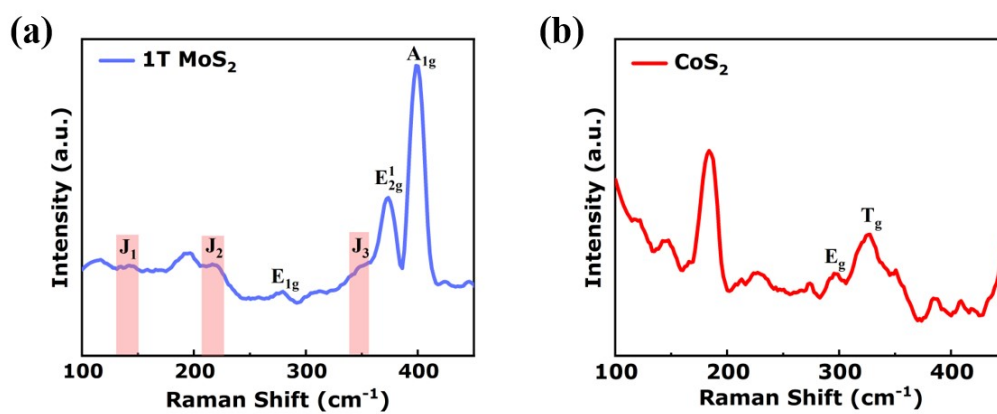

Fig. S2 (a) 1T MoS<sub>2</sub> nanosheets and (b) CoS<sub>2</sub> nanowires Raman spectra.

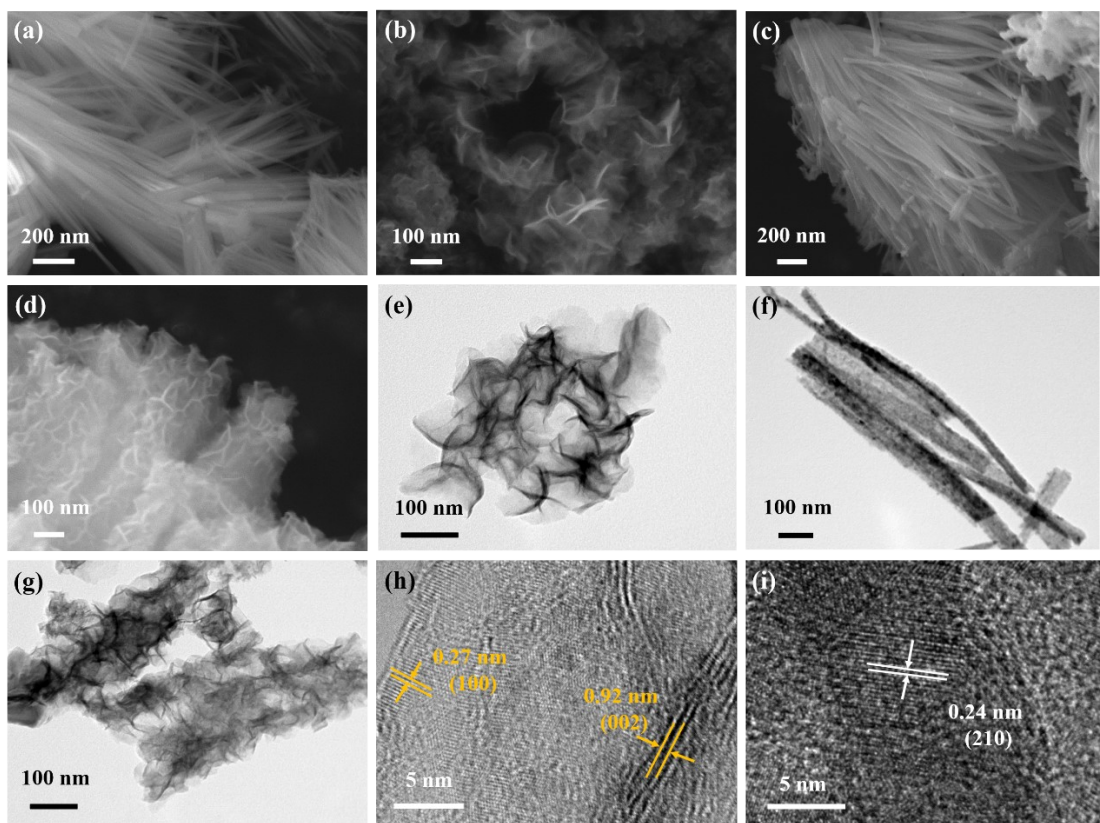

**Fig. S3** (a-d) SEM images of Co precursor, 1T MoS<sub>2</sub> nanosheets, CoS<sub>2</sub> nanowires and 1T MoS<sub>2</sub>/CoS<sub>2</sub> nanorods; (e-g) TEM images of 1T MoS<sub>2</sub> nanosheets, CoS<sub>2</sub> nanowires and 1T MoS<sub>2</sub>/CoS<sub>2</sub> nanorods; (h-i) HRTEM images of 1T MoS<sub>2</sub> nanosheets and CoS<sub>2</sub> nanowires.

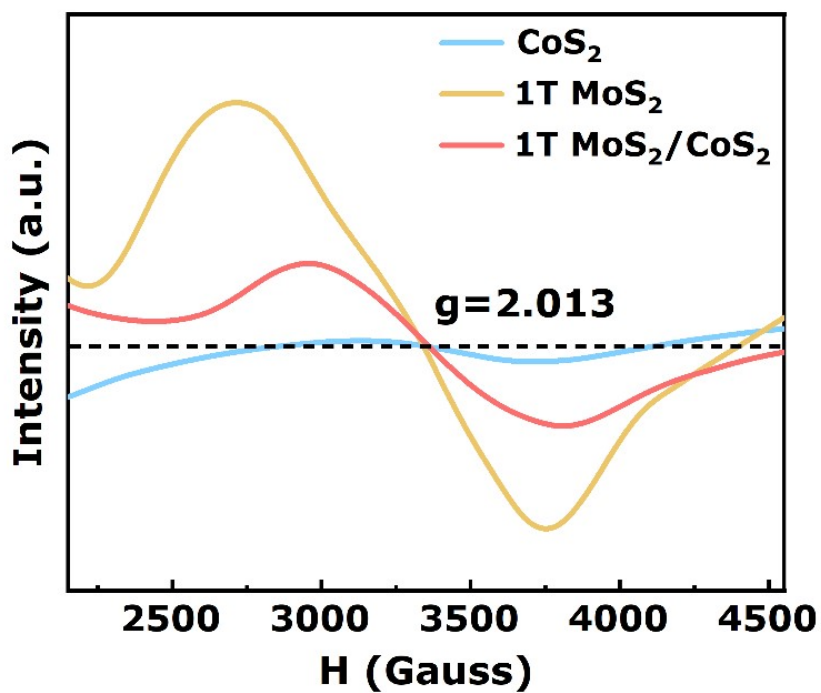

Fig. S4 EPR spectra of CoS<sub>2</sub> nanowires, 1T MoS<sub>2</sub> nanosheets and 1T MoS<sub>2</sub>/CoS<sub>2</sub> nanorods.

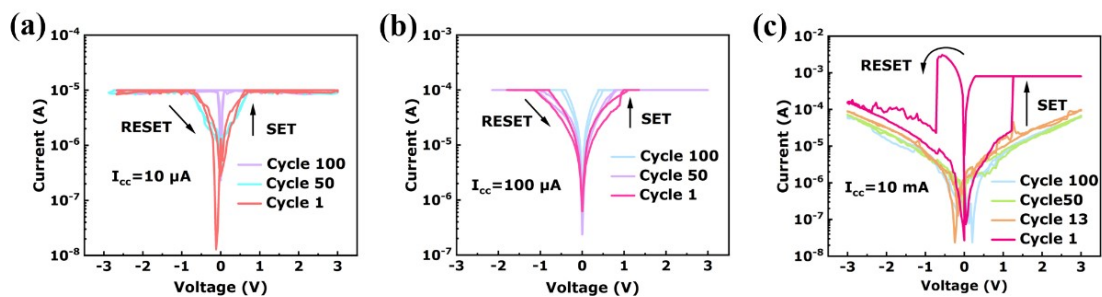

Fig. S5 The I-V curves of Al/1T MoS<sub>2</sub>/CoS<sub>2</sub>-SA/ITO/PET device with the compliance current is a) 10 μA; (b) 100 μA; c) 10 mA.

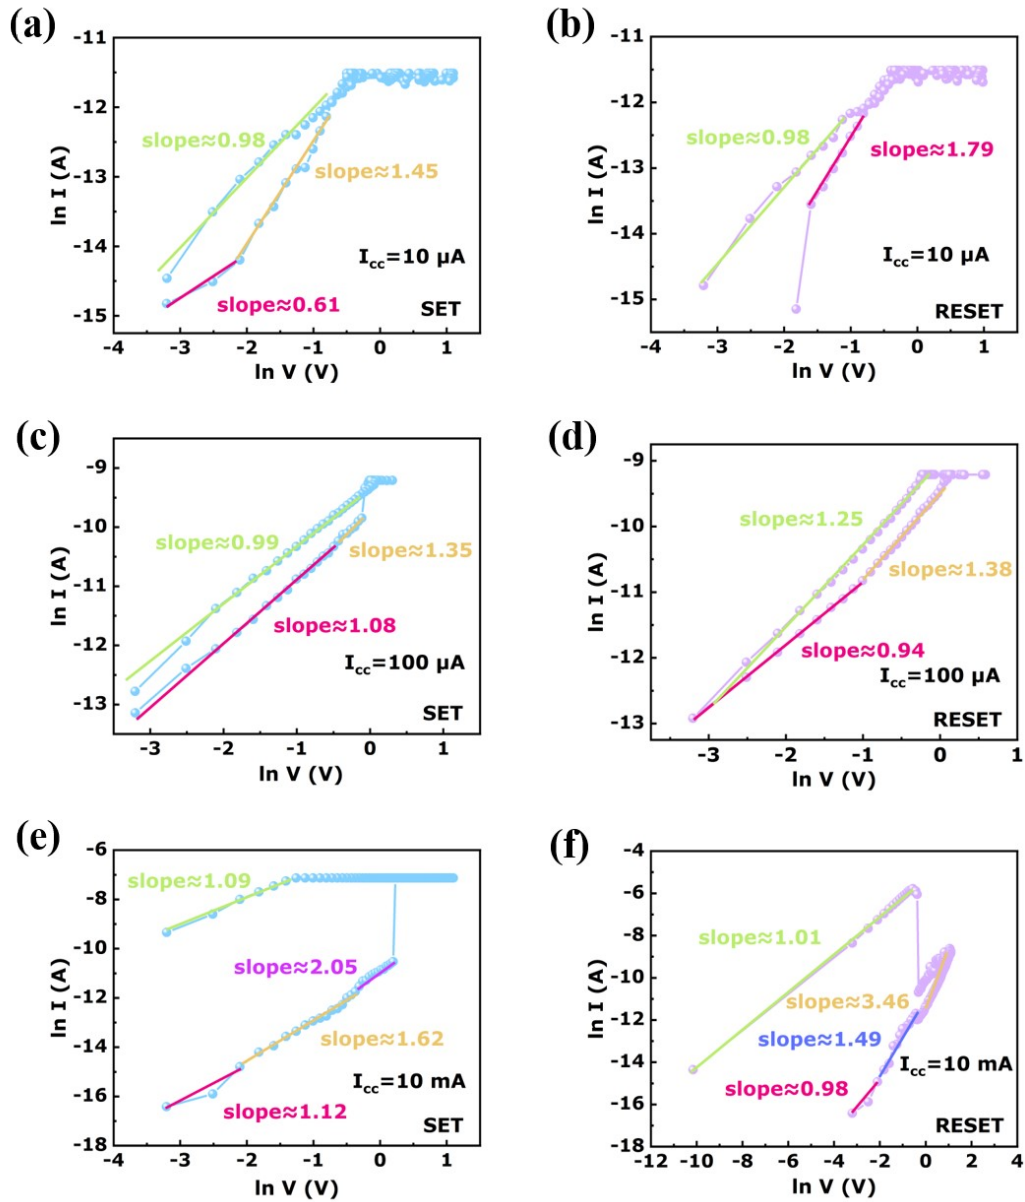

**Fig. S6** The Double logarithmic plots of current and voltage for I-V curves of Al/1T MoS<sub>2</sub>/CoS<sub>2</sub>-SA/ITO/PET device with the compliance current is (a-b) 10  $\mu\text{A}$ ; (c-d) 100  $\mu\text{A}$ ; (e-f) 10 mA.

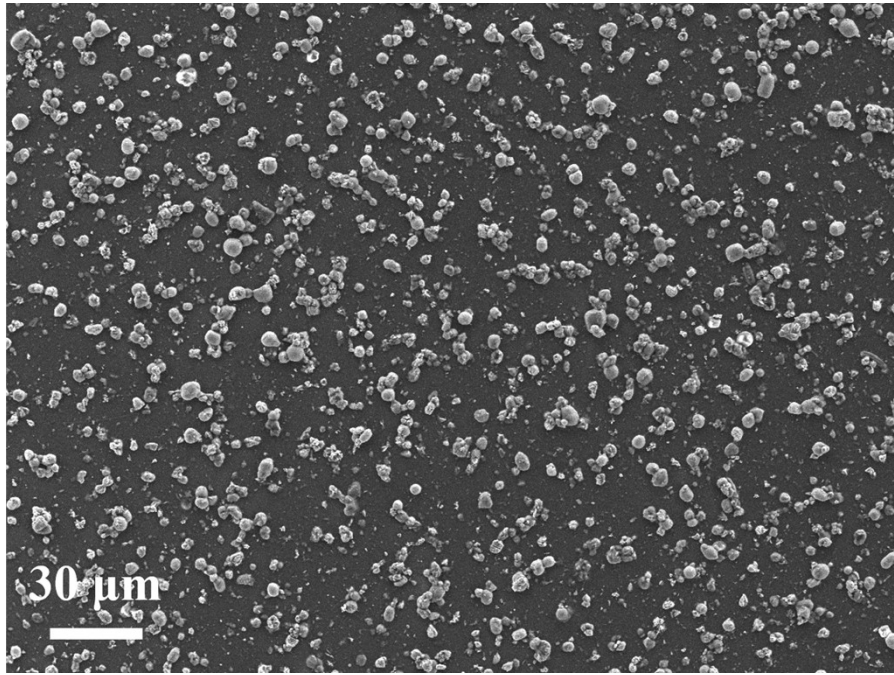

Fig. 7 The SEM image of Al/1T MoS<sub>2</sub>/CoS<sub>2</sub>-SA/ITO/PET device surface.

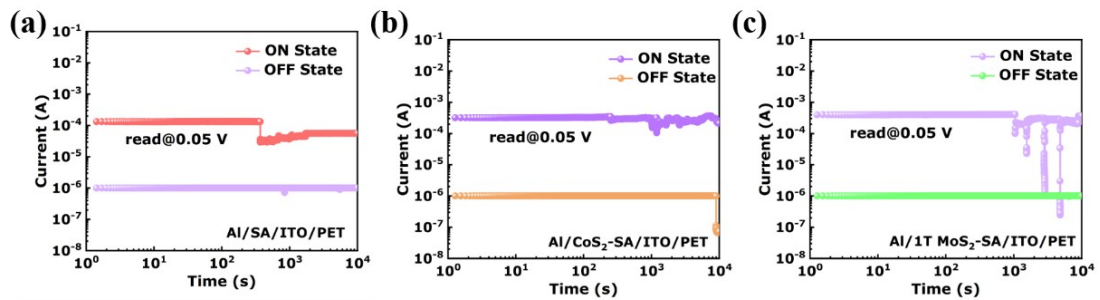

Fig. S8 The I-t diagram of (a) Al/SA/ITO/PET, (b) Al/CoS<sub>2</sub>-SA/ITO/PET and (c) Al/1T MoS<sub>2</sub>-SA/ITO/PET device at a read voltage of 0.05 V.

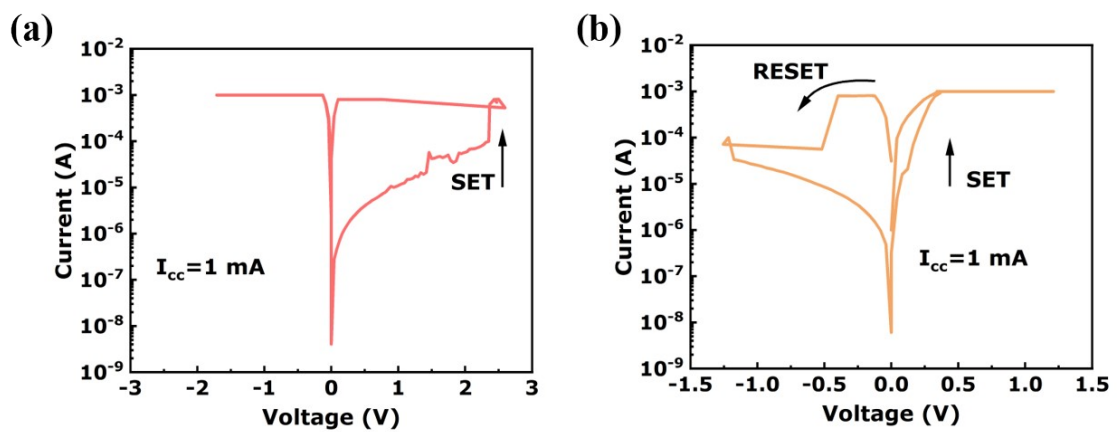

Fig. S9 I-V diagram of Al/1T MoS<sub>2</sub>/CoS<sub>2</sub>-SA/ITO/PET device coated with two layers.

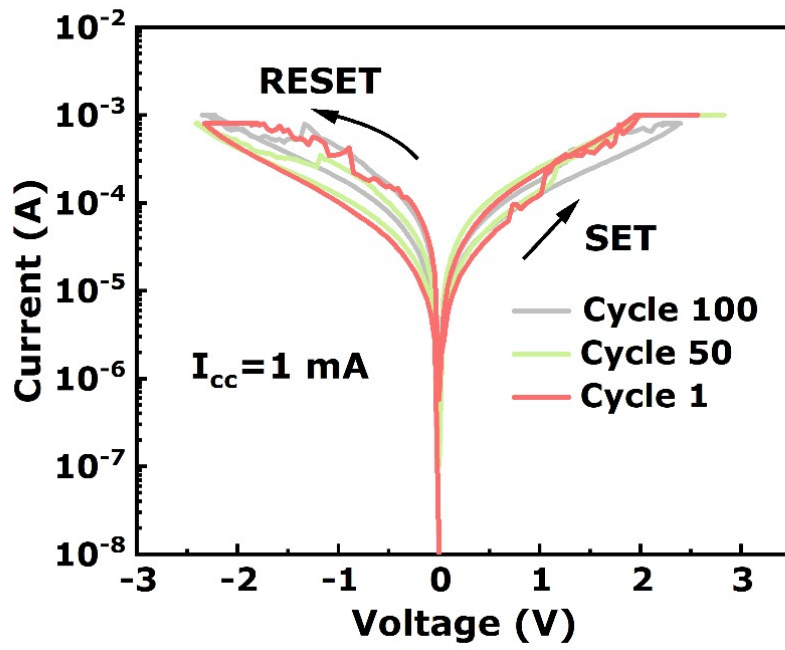

Fig. S10 I-V diagram of Al/1T MoS<sub>2</sub>/CoS<sub>2</sub>-SA/ITO/PET device coated with three layers.

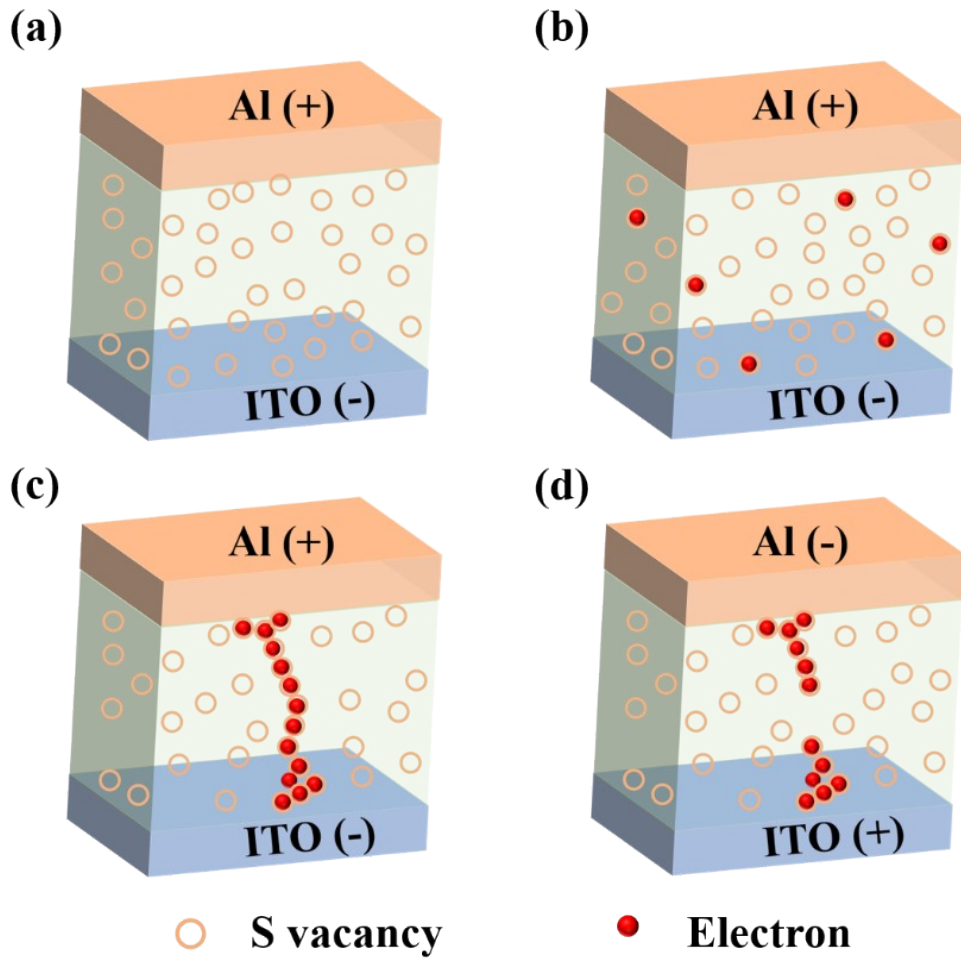

**Fig. S11** Schematic diagram of switching mechanism in Al/CoS<sub>2</sub>-SA/ITO/PET device.



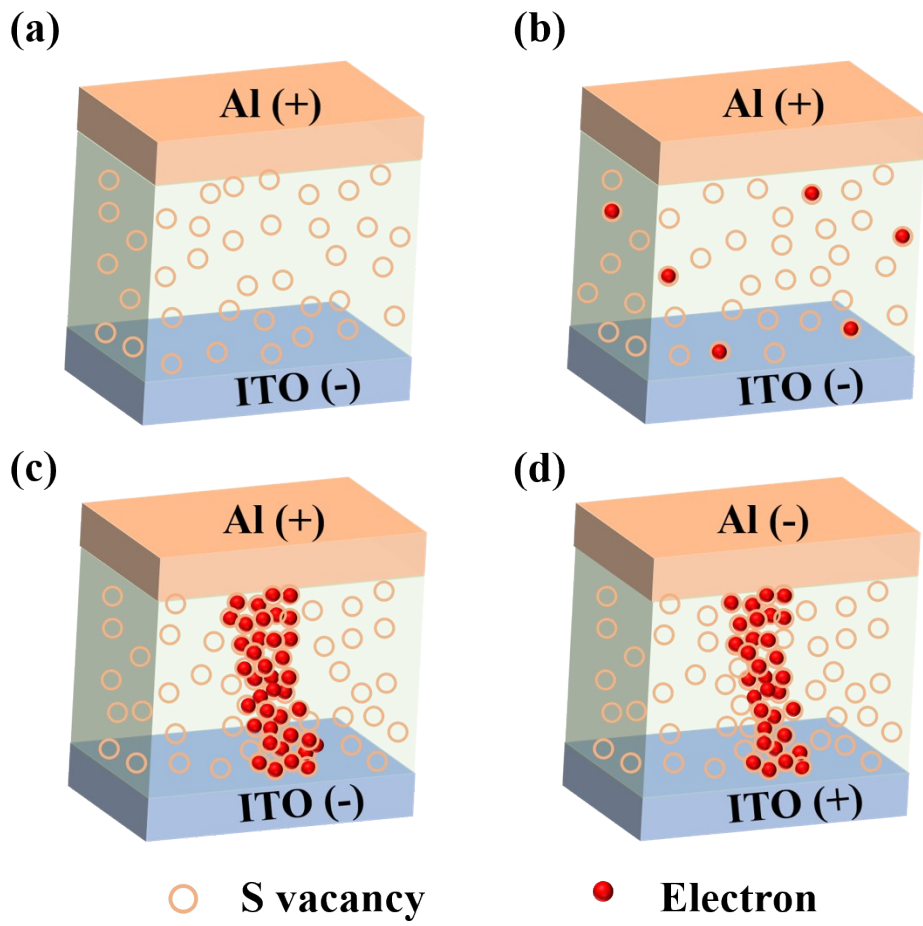

**Fig. S12** Schematic diagram of switching mechanism in Al/IT MoS<sub>2</sub>-SA/ITO/PET device.

**Table S1.** Comparison of the key performance parameters of MoS<sub>2</sub>-based flexible RRAM devices.

| Structures                                           | V <sub>reset</sub> /V <sub>set</sub><br>(V) | Endurance<br>cycles | Retention<br>time (s) | Referen<br>ce |
|------------------------------------------------------|---------------------------------------------|---------------------|-----------------------|---------------|
| Al/1T MoS <sub>2</sub> /CoS <sub>2</sub> -SA/ITO/PET | -1.73/1.7                                   | 100                 | 10 <sup>4</sup>       | This<br>work  |
| Au/MoS <sub>2</sub> /Au                              | -0.9/2.7                                    | 20                  | 10 <sup>4</sup>       | [1]           |
| Ag/MoS <sub>2</sub> /Ti/Au                           | -0.4/0.3                                    | 350                 | 10 <sup>4</sup>       | [2]           |
| Ag/PVP: MoS <sub>2</sub> /HfO <sub>x</sub> /ITO      | -1.18/2.1                                   | 500                 | 10 <sup>4</sup>       | [3]           |
| Ag/MoS <sub>2</sub> /polymer/Cr/Au                   | -0.7/0.5                                    | 300                 | 10 <sup>3</sup>       | [4]           |
| Ti/Au/MoS <sub>2</sub> /PDMS                         | -15/15                                      | 100                 | 10 <sup>3</sup>       | [5]           |
| Al/MoS <sub>2</sub> -PDA-PFMMA/ITO                   | -0.9/1.1                                    | 60                  | 10 <sup>4</sup>       | [6]           |
| ITO/(MoS <sub>2</sub> :PS)/Al                        | -2.5/2.7                                    | 25                  | 400                   | [7]           |
| Cu/gMoS <sub>2</sub> -PMMA/ITO                       | 1.3/-1.2                                    | 100                 | 10 <sup>4</sup>       | [8]           |
| Ti/MoS <sub>2</sub> -rGO/ITO                         | -0.48/0.5                                   | 200                 | 10 <sup>4</sup>       | [9]           |
| Ag/MoS <sub>2</sub> /Au/Ti/PET                       | -0.8/1.1                                    | 90                  | 10 <sup>4</sup>       | [10]          |

## References

- 1 S. Bhattacharjee, E. Caruso, N. McEvoy, C. Ó Coileáin, K. O'Neill, L. Ansari, G. S. Duesberg, R. Nagle, K. Cherkaoui, F. Gity and P. K. Hurley, *ACS Appl. Mater. Interfaces*, 2020, **12**, 6022–6029.
- 2 A. Bala, A. Sen, J. Shim, S. Gandla and S. Kim, *ACS Nano*, 2023, **17**, 13784–13791.
- 3 I. Varun, A. K. Mahato, V. Raghuvanshi and S. P. Tiwari, *IEEE Trans. Electron Devices*, 2020, **67**, 3472–3477.
- 4 J. Chai, S. Tong, C. Li, C. Manzano, B. Li, Y. Liu, M. Lin, L. Wong, J. Cheng, J. Wu, A. Lau, Q. Xie, S. J. Pennycook, H. Medina, M. Yang, S. Wang and D. Chi, *Adv. Mater.*, 2020, **32**, 2002704.
- 5 E. Lee, J. Kim, S. Bhoyate, K. Cho and W. Choi, *Chem. Mater.*, 2020, **32**, 10447–10455.
- 6 Yan, Q., Fan, F., Zhang, B., Liu, G., & Chen, Y., *European Polymer Journal*, 2022, **174**, 111316.
- 7 L. T. Manamel, S. C. Madam, S. Sagar and B. C. Das, *Nanotechnology*, 2021, **32**, 35LT02.

- 8 S. Bhattacharjee, U. Das, P. K. Sarkar and A. Roy, *Organic Electronics*, 2018, **58**, 145–152.
- 9 L. Wu, J. Guo, W. Zhong, W. Zhang, X. Kang, W. Chen and Y. Du, *Applied Surface Science*, 2019, **463**, 947–952.
- 10 R. M. Pallares, X. Su, S. H. Lim and N. T. K. Thanh, *J. Mater. Chem. C*, 2016, **4**, 53–61.
